## Correction

# Correction: Erg Channel Is Critical in Controlling Cell Volume during Cell Cycle in Embryonic Stem Cells

## The PLOS ONE Staff

There is an error in Figure 4. Figures 4B and 4C should have the y-axis labeled "Young's Modulus (Pa)." Please see the corrected version of Figure 4 here.

Figure 4

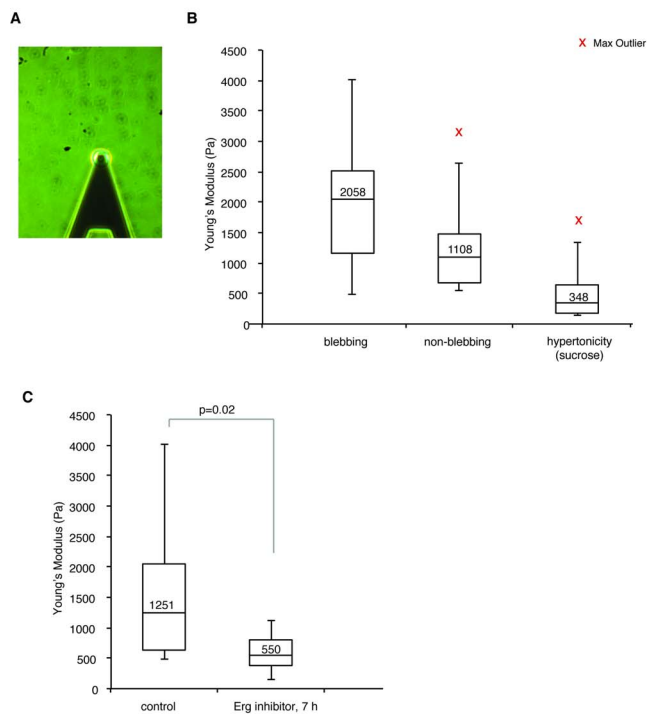

**Figure 4. Erg inhibition decreased stiffness in mESCs.** (A) A representative image of the cantilever placed over a mESC during atomic force microscopy. (B) In control conditions, blebbing cells showed a trend towards higher stiffness than non-blebbing cells ( $n = 7$ ,  $p = 0.17$ , median indicated in box) and control cells that were subjected for hypertonic medium (sucrose 20 mM) for one hour showed reduced stiffness ( $n = 11$ ,  $p < 0.001$ ). (C) After 7 h of Erg inhibition (E4031; 10  $\mu$ M) treated cells ( $n = 8$ ) were significantly ( $p = 0.02$ , t-test unequal variance) less stiff than control cells ( $n = 18$ ).  
doi:10.1371/journal.pone.0090271.g001

## Reference

- Abdelhady S, Kitambi SS, Lundin V, Aufschnaiter R, Sekyrova P, et al. (2013) Erg Channel Is Critical in Controlling Cell Volume during Cell Cycle in Embryonic Stem Cells. PLoS ONE 8(8): e72409. doi:10.1371/journal.pone.0072409

**Citation:** The PLOS ONE Staff (2014) Correction: Erg Channel Is Critical in Controlling Cell Volume during Cell Cycle in Embryonic Stem Cells. PLoS ONE 9(3): e90271. doi:10.1371/journal.pone.0090271

**Published:** March 20, 2014

**Copyright:** © 2014 The PLOS ONE Staff. This is an open-access article distributed under the terms of the Creative Commons Attribution License, which permits unrestricted use, distribution, and reproduction in any medium, provided the original author and source are credited.
